# Supplementary material for: CpG-Methylation Regulates a Class of Epstein-Barr Virus Promoters
Source: PubMed Central journal article supplement (PMC2944802; doi:10.1371/journal.ppat.1001114), 2010-09-23
Supplement: ppat.1001114.s006.pdf [file ppat.1001114.s006.pdf]

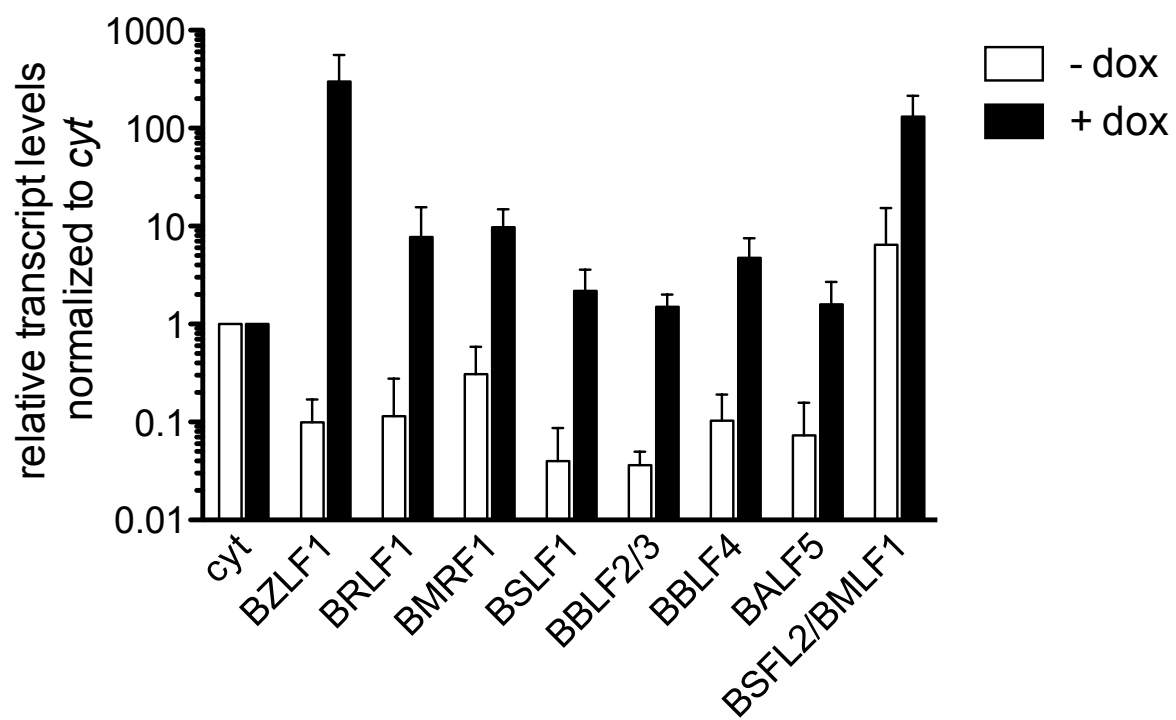

Bergbauer et al.  
Supporting Fig. S5
